# Supplementary material for: The mechanism of toluene-assisted crystallization of organic–inorganic perovskites for highly efficient solar cells
Source: Royal Society of Chemistry journal article supplement (doi:10.1039/c6ta01087c), 2016-01-01
Supplement: c6ta01087c1.pdf [file c6ta01087c1.pdf]

*Supporting information*

**The Mechanism of Toluene-assisted Crystallization of Organic-inorganic  
Perovskites for Highly Efficient Solar Cells**

*Nobuya Sakai<sup>1</sup>, Sandeep Pathak<sup>1</sup>, Hsin-WeiChen<sup>2</sup>, Amir A. Haghighirad<sup>1</sup>, Samuel D. Stranks<sup>3</sup>, Tsutomu Miyasaka<sup>2\*</sup>, Henry J. Snaith<sup>1\*</sup>*

- 1. Clarendon Laboratory, Department of Physics, University of Oxford, Parks road, Oxford, OX1 3PU, United Kingdom*
- 2. Graduate School of Engineering, Toin University of Yokohama, Kuroganecho 1614, Aoba, Yokohama, Kanagawa 225-8503, Japan*
- 3. Research Laboratory of Electronics, Massachusetts Institute of Technology, 77 Massachusetts Avenue, Cambridge, MA, 02139, U.S.A*

Table S1. Unit cell dimensions ( $a$ ,  $b$  and  $c$  axis) and unit cell volume for the different perovskite crystals. FWHM at and (110) reflections and calculated crystalline size at the same reflection

|                        |      | $a=b(\text{\AA})$ | $c(\text{\AA})$ | Cell Volume ( $\text{\AA}^3$ ) | Average crystallite size (nm) |
|------------------------|------|-------------------|-----------------|--------------------------------|-------------------------------|
| MAI:PbI <sub>2</sub>   | w/o  | 8.87329           | 12.5976         | 991.8                          | 114                           |
|                        | with | 8.86904           | 12.6216         | 992.8                          | 95.7                          |
| 3MAI:PbI <sub>2</sub>  | w/o  | 8.81562           | 12.5714         | 977.0                          | 67.6                          |
|                        | with | 8.85053           | 12.6084         | 987.6                          | 75.7                          |
| 3MAI:PbCl <sub>2</sub> | w/o  | 8.86029           | 12.6052         | 989.6                          | 123                           |
|                        | with | 8.81927           | 12.5479         | 975.9                          | 129                           |

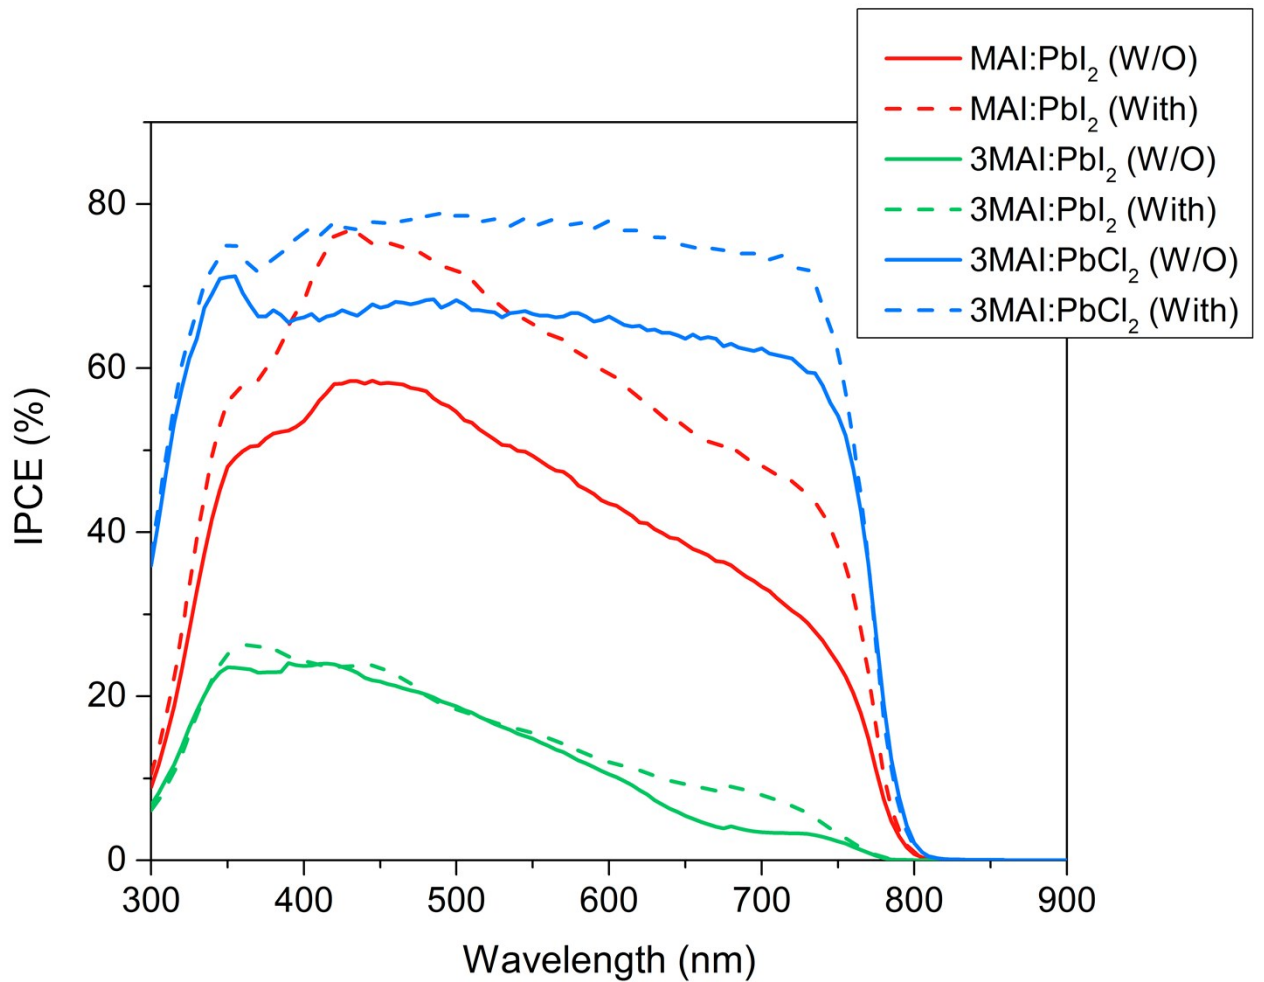

Figure S1. IPCE spectra of each perovskite solar cells without and with toluene drenching.

We observe that the perovskite solar cells fabricated from 3MAI:PbCl<sub>2</sub> shows higher IPCE value on whole wavelength as compared with MAI:PbI<sub>2</sub> and 3MAI:PbI<sub>2</sub>. Upon toluene treatment, the IPCE values of 3MAI:PbCl<sub>2</sub> and MAI:PbI<sub>2</sub> are increase by 10% and 20%, respectively. However, 3MAI:PbI<sub>2</sub> does not show a clear increase of IPCE value with toluene treatment.

Table S2. Performance parameters for perovskite solar cells with different perovskite precursor.

|                                        | <i>Scan direction</i>       | $J_{sc}$<br>( $mA\ cm^{-2}$ ) | $V_{oc}$ (V) | <i>FF (%)</i> | <i>PCE (%)</i> | <i>SPO (%)</i> |
|----------------------------------------|-----------------------------|-------------------------------|--------------|---------------|----------------|----------------|
| MAI:PbI <sub>2</sub>                   | $V_{oc} \rightarrow J_{sc}$ | 16.6                          | 0.82         | 54.6          | 7.19           | 2.36 ± 1.59    |
|                                        | $J_{sc} \rightarrow V_{oc}$ | 14.1                          | 0.83         | 28.7          | 3.56           |                |
| MAI:PbI <sub>2</sub><br>with Toluene   | $V_{oc} \rightarrow J_{sc}$ | 20.1                          | 0.95         | 64.5          | 12.7           | 5.10 ± 0.58    |
|                                        | $J_{sc} \rightarrow V_{oc}$ | 17.3                          | 0.84         | 23.5          | 3.78           |                |
| 3MAI:PbCl <sub>2</sub>                 | $V_{oc} \rightarrow J_{sc}$ | 18.6                          | 0.86         | 68.7          | 11.0           | 6.16 ± 0.71    |
|                                        | $J_{sc} \rightarrow V_{oc}$ | 17.4                          | 0.76         | 56.2          | 7.46           |                |
| 3MAI:PbCl <sub>2</sub><br>with Toluene | $V_{oc} \rightarrow J_{sc}$ | 22.7                          | 0.97         | 74.1          | 16.3           | 12.7 ± 1.27    |
|                                        | $J_{sc} \rightarrow V_{oc}$ | 23.2                          | 0.88         | 59.7          | 12.1           |                |
| 3MAI:PbI <sub>2</sub>                  | $V_{oc} \rightarrow J_{sc}$ | 13.9                          | 0.68         | 44.4          | 4.22           | 1.09 ± 0.31    |
|                                        | $J_{sc} \rightarrow V_{oc}$ | 12.1                          | 0.63         | 21.5          | 1.83           |                |
| 3MAI:PbI <sub>2</sub><br>with Toluene  | $V_{oc} \rightarrow J_{sc}$ | 15.9                          | 0.81         | 63.1          | 8.15           | 1.84 ± 0.34    |
|                                        | $J_{sc} \rightarrow V_{oc}$ | 12.0                          | 0.67         | 19.2          | 1.84           |                |
